# Supplementary material for: Building de novo reference genome assemblies of complex eukaryotic microorganisms from single nuclei
Source: PubMed Central journal article supplement (PMC6987183; doi:10.1038/s41598-020-58025-3), 2020-01-28
Supplement: 41598_2020_58025_MOESM1_ESM.pdf [file 41598_2020_58025_MOESM1_ESM.pdf]

1 **Building *de novo* reference genome assemblies of complex eukaryotic**  
2 **microorganisms from single nuclei**

3 Merce Montoliu-Nerin, Marisol Sánchez-García, Claudia Bergin, Manfred Grabherr,  
4 Barbara Ellis, Verena Esther Kutschera, Marcin Kierczak, Hanna Johannesson, Anna  
5 Rosling

6

7

8 Supplementary information, 9 figures and 6 tables

9

- 10 Figure S1. Spores of *C. claroideum*/*C. luteum* (SA101)  
11 Figure S2. Scatter plots from the FACS sorting during method development  
12 Figure S3. Agarose gel of PCR products of particles in R1, R2-R4, R4  
13 Figure S4. Scatter plot of particles from one single crushed spore  
14 Figure S5. PCR scoring for fungi and bacteria in amplified single nuclei  
15 Figure S6. Summary statistics for assembled of 1-24 nuclei in assembly workflows 1  
16 Figure S7. Original gel image corresponding to figure S3  
17 Figure S8. Original gel image corresponding to the upper part of figure S5  
18 Figure S9. Original gel image corresponding to the lower part of figure S5  
19  
20 Table S1. Number of particles collected  
21 Table S2. 96 well plate layout for sorting.  
22 Table S3. Summary of PCR scoring for fungi and bacteria  
23 Table S4. DNA concentrations of 24 sorted and amplified nuclei  
24 Table S5. Single nuclei assembly statistics for the assembly workflow 1 and 2  
25 Table S6. Presence of the single copy genes EF1 and RPB1 in the three assemblies  
26

27 Developing the protocol of single nuclei extraction

28 Broken spores were observed in a microscope equipped with a fluorescent filter to  
29 assess amount, release efficiency and size of the nuclei. Spores were placed on a slide  
30 and the excess water was removed with a pipette. A small drop of Gold Slow Fade +  
31 DAPI was added and the glass cover was placed pressing gently with the back of a  
32 pencil, to crush open the spore without destroying it. Crushed spores were visualized  
33 under fluorescent microscope. (Figure S1, Original pictures in OSF Repository<sup>44</sup>).

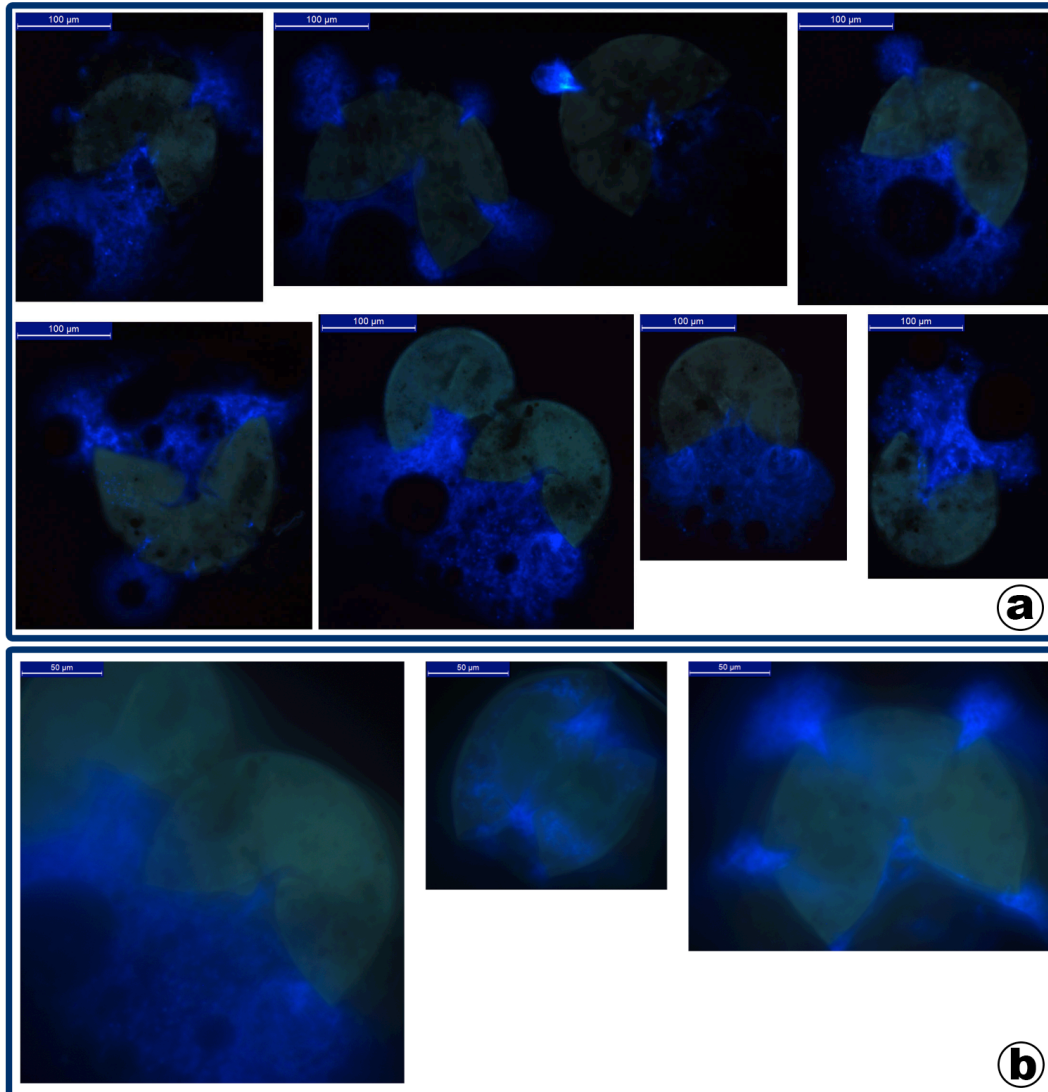

34 Figure S1. Spores of *C. claroideum*/*C. luteum* (SA101) at 20X (a) and 40X (b) seen in  
35 the microscope after staining with DAPI in order to visualize the nuclei and assess their  
36 size.  
37

38  
39 For the sorting of the nuclei, two tubes with 15 and 25 spores of the isolate respectively,  
40 previously extracted and cleaned were crushed in 200 µl of ddH<sub>2</sub>O, and 200 µl of 1X  
41 PBS was added together with 1.25 µl of 200X SYBR Green. After 37 min staining, 100  
42 µl of 1X PBS was added to increase the volume before running the sample in the FACS.  
43 FSC on the 488 nm laser was used as trigger, and a 530±20 nm (530/40) band pass filter  
44 for fluorescence signal detection. The best resolution of distinctive populations of  
45 particles in the scatter plot was obtained when plotting level of fluorescence against the  
46 SSC representing granularity (Figure S2).

47 Three regions were defined in the scatter plot: R1 (a distinctive line with strong  
 48 fluorescence), R4 (a distinctive community lower fluorescence and lower SSC values  
 49 than R1), and R2 minus R4 (an undifferentiated area between R1 and the background  
 50 fluorescence) (Figure S2). Particles appearing in those areas were sorted  
 51 simultaneously into three different tubes (Table S1). Additionally, two tubes were filled  
 52 with particles from all the areas in each sorting round, to be used as a positive control.

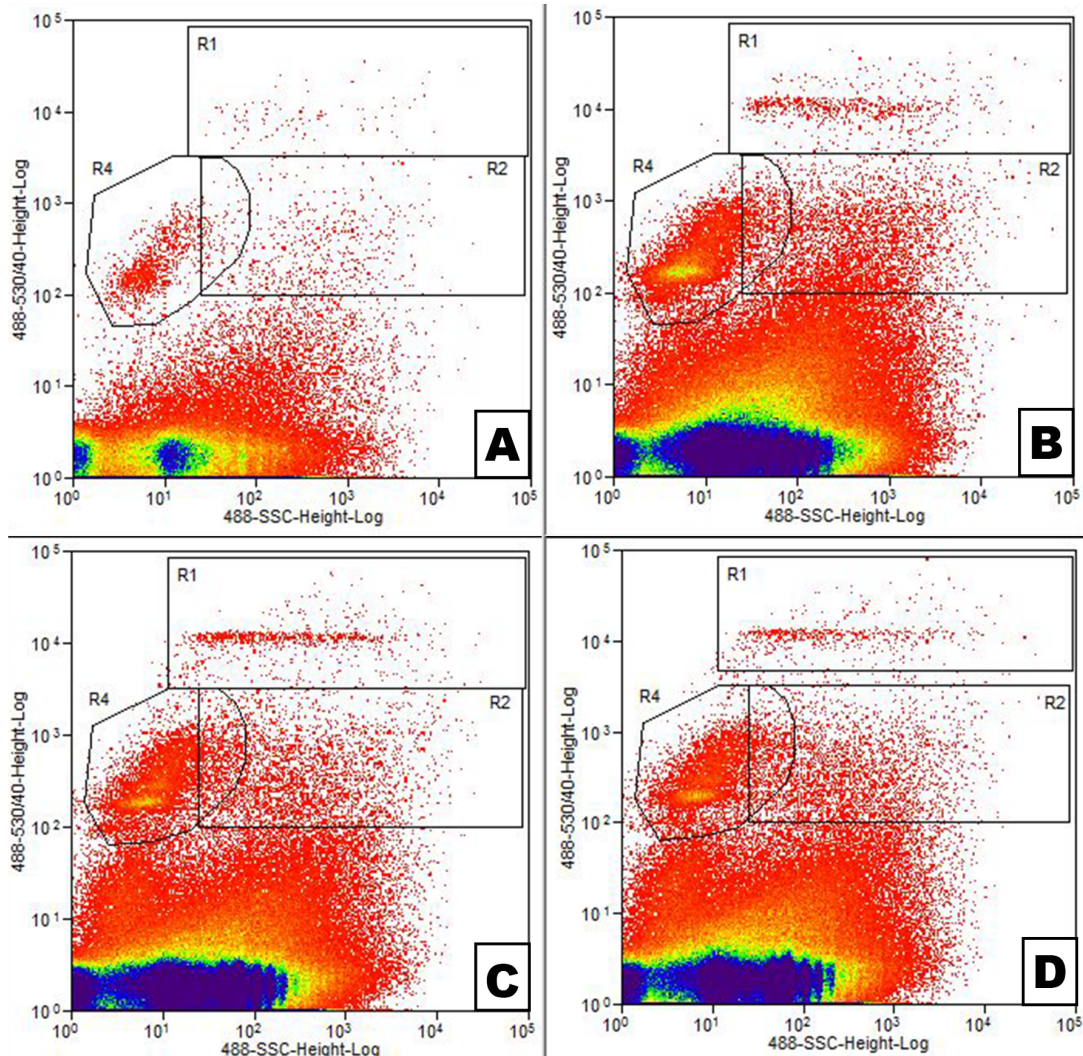

53  
 54 Figure S2. Scatter plots from the FACS sorting of particles from 15 (a, b) or 25 (c, d)  
 55 crushed spores using Forward Scatter (FSC) as trigger. On the x axis, SSC, on the y  
 56 axis, the SYBR Green fluorescence. The low-fluorescence part of the scatter plots  
 57 represents background fluorescence in the spore content, that is either not stained or  
 58 very lightly stained. a) Scatter plot of from the first quick run identifying the areas to  
 59 sort from. b) Scatter plot of actual sorting into pools (R1, R2, R4) of particles from the  
 60 15 spores (Table S1). c) Scatter plot of sorting into pools (R1, R2, R4) of particles from  
 61 the 25 spores (Table S1). d) Scatter plot when sorting only the area R1 from 25 crushed  
 62 spores (Table S1).

63  
 64 DNA was extracted from each of the tubes using the Genomic DNA from Plant kit  
 65 (Macherey-Nagel, Germany) in order to obtain clean DNA that could be tested for  
 66 fungal presence. The protocol was adapted to the characteristics of the samples having  
 67 low amounts of material and no cell biological material to homogenize, and  
 68 encompassed the following: step 1, 125  $\mu$ l of buffer MC1 and 2.5  $\mu$ l of RNase A; step

69 2 was eliminated, but a short centrifuge of 30 s at 5800 xg was added to bring down the  
 70 evaporates; step 3, 7.5 µl magnetic beads and 100 µl MC2; step 4, 140 µl MC3; step 5,  
 71 140 µl MC4; step 6, 125 µl of 80% ethanol; step 7, 125 µl MC5; step 8, 30 µl MC6.  
 72 Nanodrop was used to determine the amount of DNA in the samples after the DNA  
 73 extraction (Table S1).

74

75 Table S1. Number of particles collected for each region and assessment of the DNA  
 76 amount using nanodrop after extracting DNA from the samples.

| Sample    |             | Number of particles | Nanodrop (ng/µl DNA) |
|-----------|-------------|---------------------|----------------------|
| 15 spores | R4          | 10795               | 21.5                 |
|           | R1          | 778                 | 22.7                 |
|           | R2 (- R4)   | 4846                | 28.1                 |
|           | All regions | -                   | 20.8                 |
| 25 spores | R4          | 16000               | 26.0                 |
|           | R1          | 1300                | 28.2                 |
|           | R2 (- R4)   | 8000                | 22.5                 |
|           | R1          | 622                 | 26.4                 |
|           | All regions | -                   | 25.6                 |

77

78 Finally, to resolve which of the regions of the scatter plot the represent fungal nuclei,  
 79 PCR was performed using fungal specific primers ITS1F/ITS4<sup>63</sup> for amplification of  
 80 the rDNA ITS region. Reaction mixture contained 5x Buffer HF (Qiagen, Sweden), 2  
 81 mM MgCl<sub>2</sub>, 0.2 mM deoxynucleoside triphosphates (dNTPs), 0.4 mM DMSO, a 0.25  
 82 µM concentration of each primer, and 1 U Phusion DNA polymerase (Qiagen, Sweden).  
 83 The PCR protocol included an initial denaturing step of 30 s at 98°C, followed by 35  
 84 cycles of 30 s at 98°C, 30 s at 57.5°C, and 30 s at 72°C, before a final elongation step  
 85 of 10 min at 72°C. The reaction was performed with a 2720 Thermocycler of Applied  
 86 Biosystems (Fishers Scientific, Sweden). Amplification products were separated by gel  
 87 electrophoresis (1.5 % agarose) at 70V for 80 min and visualized using the imaging  
 88 system Molecular Imager Gel Doc XR+ (Bio-Rad Laboratories, USA) and the software  
 89 Image Lab v 4.1 build 16 (Bio-Rad Laboratories, USA). Based on the gel visualization  
 90 we concluded that fungal nuclei were most frequently appearing in the region R1 of the  
 91 scatter plot, as these samples generally showed stronger amplification of the fungal  
 92 barcode region (Figure S3).

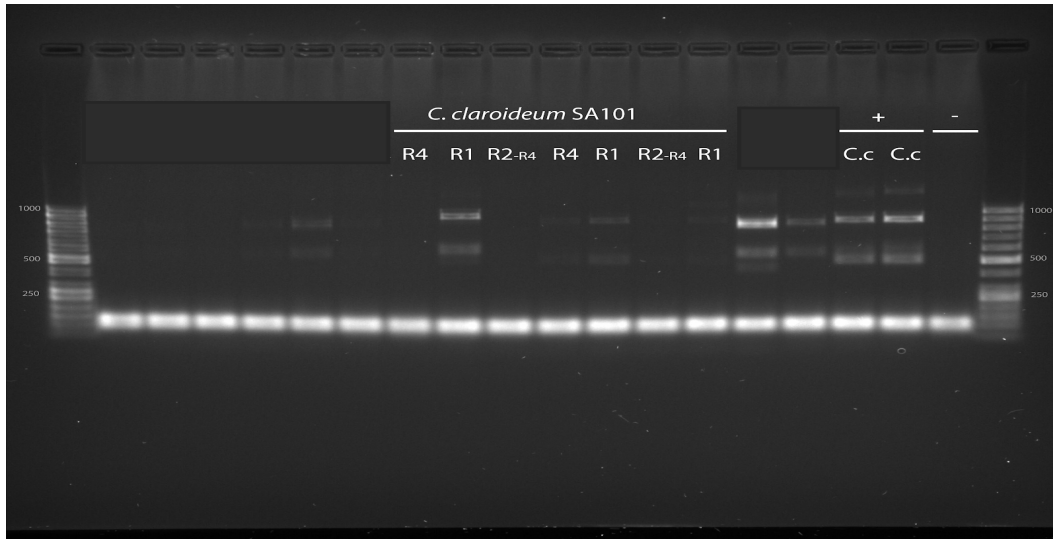

93  
94  
95  
96  
97  
98  
99  
100  
101

Figure S3. Agarose gel showing the PCR products for particles collected from the scatter plot regions R1, R2-R4, R4 as well as a pool of all regions as positive control sorted from *C. clarioideum* /*C. luteum* (SA101). Gel electrophoresis was done using a 1.5% agarose gel, run for 80 min at 70 V. Thermo Scientific GeneRuler 50 bp DNA Ladder was used. For easier visualization, samples that belong to other samples have been covered, no further modification was done, for original image see Figure S7.

#### Nuclei extraction and sorting

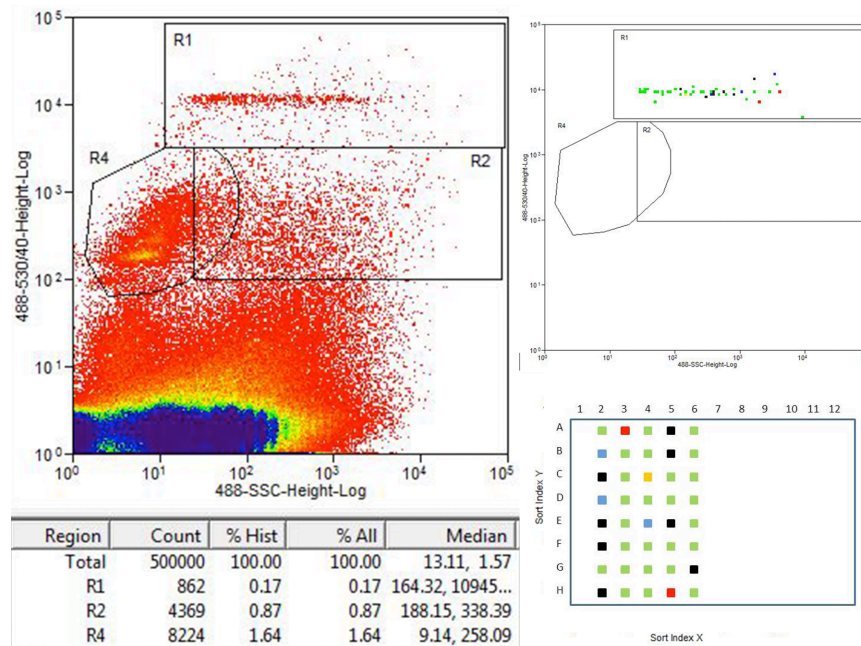

102  
103  
104  
105  
106  
107  
108  
109  
110

Figure S4. To the left, scatter plot of particles from one single crushed spore from which the R1 region was sorted into wells. Two right panels, the particles that were sorted and were further tested for fungi/bacteria. Every particle can be traced back from the plate to the exact sorting event. Colors represent the obtained results observed in Figure S5: fungal positives/bacteria negatives (green), fungal positives/bacteria positives (blue), fungal negatives/bacteria positives (red), no amplification (black).

111 Table S2. 96 well plate layout for sorting. In blue, empty wells as negative controls; in  
 112 light orange, single particles; in dark orange, 5 particles for positive control. Half plates  
 113 were filled to reduce risk and cost in downstream handling.

|   | 1 | 2 | 3 | 4 | 5 | 6 | 7 | 8 | 9 | 10 | 11 | 12 |
|---|---|---|---|---|---|---|---|---|---|----|----|----|
| A |   | 1 | 1 | 1 | 1 | 1 |   |   |   |    |    |    |
| B |   | 1 | 1 | 1 | 1 | 1 |   |   |   |    |    |    |
| C |   | 1 | 1 | 1 | 1 | 1 |   |   |   |    |    |    |
| D |   | 1 | 1 | 1 | 1 | 5 |   |   |   |    |    |    |
| E |   | 1 | 1 | 1 | 1 | 1 |   |   |   |    |    |    |
| F |   | 1 | 1 | 1 | 1 | 1 |   |   |   |    |    |    |
| G |   | 1 | 1 | 1 | 1 | 1 |   |   |   |    |    |    |
| H |   | 1 | 1 | 1 | 1 | 5 |   |   |   |    |    |    |

114  
 115  
 116  
 117  
 118  
 119

Selecting single amplified nuclei for sequencing

From the sorted particles nuclei were selected for sequencing when the fungal barcode region amplified but not the bacterial region (Figure S5, Table S3). The DNA concentration of the 24 selected nuclei was estimated using Qubit (Invitrogen, Austria) (Table S4).

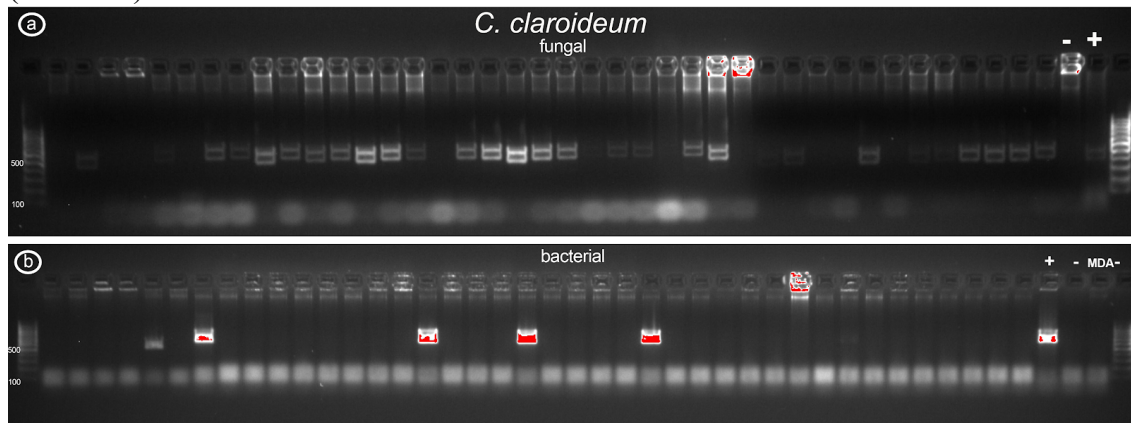

120  
 121  
 122  
 123  
 124  
 125  
 126  
 127  
 128  
 129  
 130

Figure S5. PCR amplification of sorted and MDA single nuclei for a) Fungi (positive control *Agaricus bisporus*, negative control ddH<sub>2</sub>O) and b) Bacterial (positive control *Legionella*, negative control ddH<sub>2</sub>O). Gel electrophoresis (2% agarose gel) run for 35 min at 110 V and 70 V respectively with Thermo Scientific GeneRuler 100 bp DNA Ladder. Gels images have been cropped to show only the samples of this study, no further modification was done, original images (Figure S8-S9).

Table S3. Total number (% of total) of sorted and amplified nuclei samples within the four categories Fungi +, Bacteria +, Fungi and Bacteria + and Failed/Empty, based on PCR scoring described above. Total number sorted and tested in the last column.

| Species                                         | Fungi +    | Bacteria + | Fungi & Bacteria + | Failed/Empty | Total |
|-------------------------------------------------|------------|------------|--------------------|--------------|-------|
| <i>C. claroideum</i> / <i>C. luteum</i> (SA101) | 27 (67.5%) | 2 (5%)     | 3 (7.5%)           | 8 (20%)      | 40    |

131 Table S4. DNA concentrations of whole genome amplified DNA from 24 sorted nuclei  
132 of *C. claroideum*/*C. luteum* (SA101) that were selected for sequencing.

| Sample | Well code | DNA concentration (ng/μl) |
|--------|-----------|---------------------------|
| 1      | A2        | 24.5                      |
| 2      | B2        | 26.0                      |
| 3      | D2        | 22.5                      |
| 4      | C3        | 23.3                      |
| 5      | D3        | 23.0                      |
| 6      | F3        | 23.2                      |
| 7      | G3        | 23.8                      |
| 8      | H3        | 24.9                      |
| 9      | A4        | 22.2                      |
| 10     | B4        | 23.8                      |
| 11     | C4        | 23.7                      |
| 12     | D4        | 26.2                      |
| 13     | E4        | 22.6                      |
| 14     | F4        | 26.5                      |
| 15     | G4        | 21.7                      |
| 16     | H4        | 23.7                      |
| 17     | C5        | 22.6                      |
| 18     | D5        | 26.4                      |
| 19     | G5        | 23.2                      |
| 20     | A6        | 27.2                      |
| 21     | B6        | 21.5                      |
| 22     | D6        | 23.6                      |
| 23     | E6        | 21.4                      |
| 24     | F6        | 23.8                      |

133

134 Raw read quality control

135 In the OSF repository for the project<sup>44</sup> all quality control results for the raw reads are  
136 deposited, as well as the qualitative and quantitative assessments of the assemblies.

137 The standard of Minimum Information about a Single Amplified Genome (MISAG)  
 138 developed by the Genomic Standards Consortium (GSC)<sup>64</sup> was used as a guideline to  
 139 assess the quality of the assemblies (Table S5). The highest quality obtained in this  
 140 study is a high-quality draft, considering that the final assembly still contains gaps  
 141 spanning repetitive regions. Exploring the effect of short contigs in assembly workflow  
 142 1 and found that contigs <2000bp tend to inflate genome size due to duplications  
 143 (Figure S6, Table S6).

144

145 Table S5. Single nuclei assembly statistics for the assembly workflow 1 (raw reads  
 146 assembled with MaSuRCA<sup>34</sup>) and 2 (normalized reads assembled with SPADES<sup>35</sup>).  
 147 Assembly size (Mb), number of contigs, N50, size of largest contig and % of raw  
 148 reads covered by the individual assembly is presented for each nucleus (1-24).  
 149

| nucleus | Assembly workflow 1<br>(raw reads + MaSuRCA) |              |      |                           |                             | Assembly workflow 2<br>(normalized reads + SPADES) |              |       |                           |                             |
|---------|----------------------------------------------|--------------|------|---------------------------|-----------------------------|----------------------------------------------------|--------------|-------|---------------------------|-----------------------------|
|         | Size<br>(Mb)                                 | #<br>Contigs | N50  | Largest<br>contig<br>(Kb) | % or raw<br>reads<br>mapped | Size<br>(Mb)                                       | #<br>Contigs | N50   | Largest<br>contig<br>(Kb) | % or raw<br>reads<br>mapped |
| 1       | 35.44                                        | 16406        | 3231 | 36.3                      | 53.44                       | 27.9                                               | 7592         | 8568  | 58.9                      | 95.52                       |
| 2       | 31.29                                        | 15557        | 2959 | 33.1                      | 54.11                       | 24.90                                              | 6609         | 9212  | 199.9                     | 96.81                       |
| 3       | 25.03                                        | 16526        | 1672 | 13.2                      | 50.77                       | 20.14                                              | 7764         | 5294  | 61.2                      | 95.99                       |
| 4       | 31.10                                        | 14480        | 3149 | 25.6                      | 52.36                       | 22.98                                              | 6175         | 8841  | 62.4                      | 95.66                       |
| 5       | 39.00                                        | 17793        | 3351 | 32.9                      | 55.70                       | 27.72                                              | 7429         | 9343  | 78.0                      | 95.29                       |
| 6       | 36.19                                        | 16212        | 3510 | 46.6                      | 51.94                       | 27.38                                              | 7453         | 9824  | 63.8                      | 95.87                       |
| 7       | 56.06                                        | 26206        | 3199 | 31.9                      | 52.88                       | 41.98                                              | 9863         | 10068 | 95.0                      | 95.82                       |
| 8       | 51.87                                        | 23590        | 3237 | 38.9                      | 51.08                       | 39.23                                              | 9291         | 10447 | 60.6                      | 95.83                       |
| 9       | 42.24                                        | 19220        | 3284 | 30.1                      | 52.42                       | 30.72                                              | 8355         | 9500  | 71.7                      | 95.86                       |
| 10      | 51.87                                        | 23590        | 3237 | 38.9                      | 61.59                       | 16.74                                              | 5150         | 7065  | 55.5                      | 96.11                       |
| 11      | 14.47                                        | 7425         | 2705 | 22.5                      | 48.11                       | 11.78                                              | 3500         | 7214  | 41.2                      | 96.31                       |
| 12      | 45.21                                        | 21122        | 3120 | 42.3                      | 53.31                       | 33.37                                              | 8415         | 9772  | 74.8                      | 95.74                       |
| 13      | 56.85                                        | 24537        | 3785 | 38.2                      | 60.21                       | 40.47                                              | 10218        | 11172 | 147.0                     | 96.47                       |
| 14      | 18.19                                        | 10279        | 2237 | 22.6                      | 55.10                       | 14.80                                              | 4644         | 6635  | 41.9                      | 96.29                       |
| 15      | 22.47                                        | 14432        | 1804 | 14.2                      | 60.83                       | 18.47                                              | 10816        | 3085  | 38.4                      | 94.15                       |



|    |       |       |      |      |       |       |       |       |      |       |
|----|-------|-------|------|------|-------|-------|-------|-------|------|-------|
| 16 | 38.52 | 20163 | 2471 | 25.1 | 60.28 | 27.71 | 8949  | 6448  | 60.8 | 94.67 |
| 17 | 40.72 | 17740 | 3683 | 40.5 | 58.43 | 29.54 | 8651  | 9334  | 67.5 | 95.64 |
| 18 | 57.06 | 23828 | 3901 | 41.7 | 64.69 | 39.50 | 9940  | 10143 | 76.4 | 95.29 |
| 19 | 35.45 | 16004 | 3472 | 43.7 | 54.52 | 25.99 | 7608  | 9149  | 66.2 | 95.59 |
| 20 | 43.45 | 18217 | 3945 | 39.6 | 59.13 | 31.28 | 8841  | 9276  | 63.8 | 95.68 |
| 21 | 28.37 | 13758 | 2951 | 23.8 | 52.03 | 21.00 | 5886  | 8353  | 81.1 | 95.62 |
| 22 | 69.45 | 30847 | 3437 | 41.6 | 57.94 | 50.24 | 11265 | 11295 | 71.6 | 95.36 |
| 23 | 36.76 | 17998 | 2806 | 29.7 | 46.29 | 28.75 | 7364  | 9287  | 81.5 | 96.20 |
| 24 | 49.34 | 22402 | 3254 | 30.2 | 64.52 | 34.97 | 9870  | 8227  | 66.4 | 95.41 |

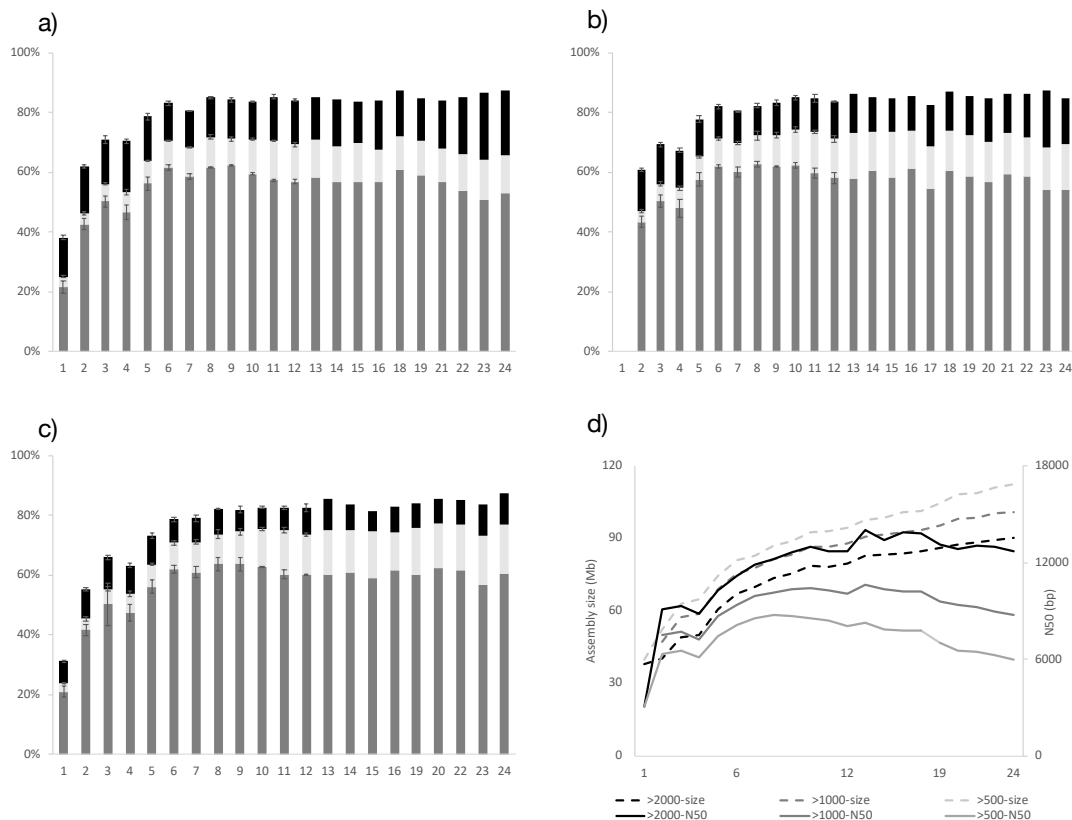

150  
151  
152  
153  
154  
155  
156  
157  
158  
159  
160

Figure S6. Summary statistics for different number of assembled nuclei (1-24) using assembly workflows 1 based on raw reads of individual nuclei assembled using Masurca, consensus assembly using Lingon. BUSCO estimates of completeness for a) workflow 1 contigs >500bp, b) workflow 1 contigs >1000bp, and c) workflow 1 contigs >2000bp. The later is the best option of the three, presented as method 1 in the main text. Percentage of single copy core genes detected as single copy (S: grey), duplicated (D: light grey) or fragmented (F: black). Average of 3-6 replicate assemblies up to 12 nuclei with error bars indicating SEM. In d) assembly size (dashed lines) and N50 (solid lines) for the there methods 1 >2000 bp (black), >10000 bp (grey) and >500 bp (light grey).

161 Table S6. Presence of the single copy genes EF1 and RPB1 in the generated assemblies.  
 162 Present as single copy in both assembly methods 1 and 3, but not in assembly method  
 163 2. Contigs and regions where the gene is found are shown on the table.

|          | EF1          |                             | RPB1                                           |                                        |
|----------|--------------|-----------------------------|------------------------------------------------|----------------------------------------|
| Assembly | Contig       | Region                      | Contig                                         | Region                                 |
| 1        | contig006909 | 1349-2165                   | contig004936                                   | 7862-10400                             |
| 1n       | contig003719 | 30811-31627                 | contig003448                                   | 7862-10400                             |
| 2        | contig010744 | 1152-1968,<br>14549-15365   | contig003808<br>contig001875<br>contig011350   | 7613-10151<br>1-1098<br>1-638          |
| 2n       | scaffold_376 | 49952-50763,<br>63349-64165 | scaffold_1261<br>scaffold_339<br>scaffold_1645 | 9366-11904<br>36857-37954<br>3258-3895 |
| 3        | contig000025 | 24541-25357                 | contig000552                                   | 15574-18112                            |
| 3n       | scaffold_129 | 24541-25357                 | scaffold_994                                   | 15574-18112                            |

164  
165

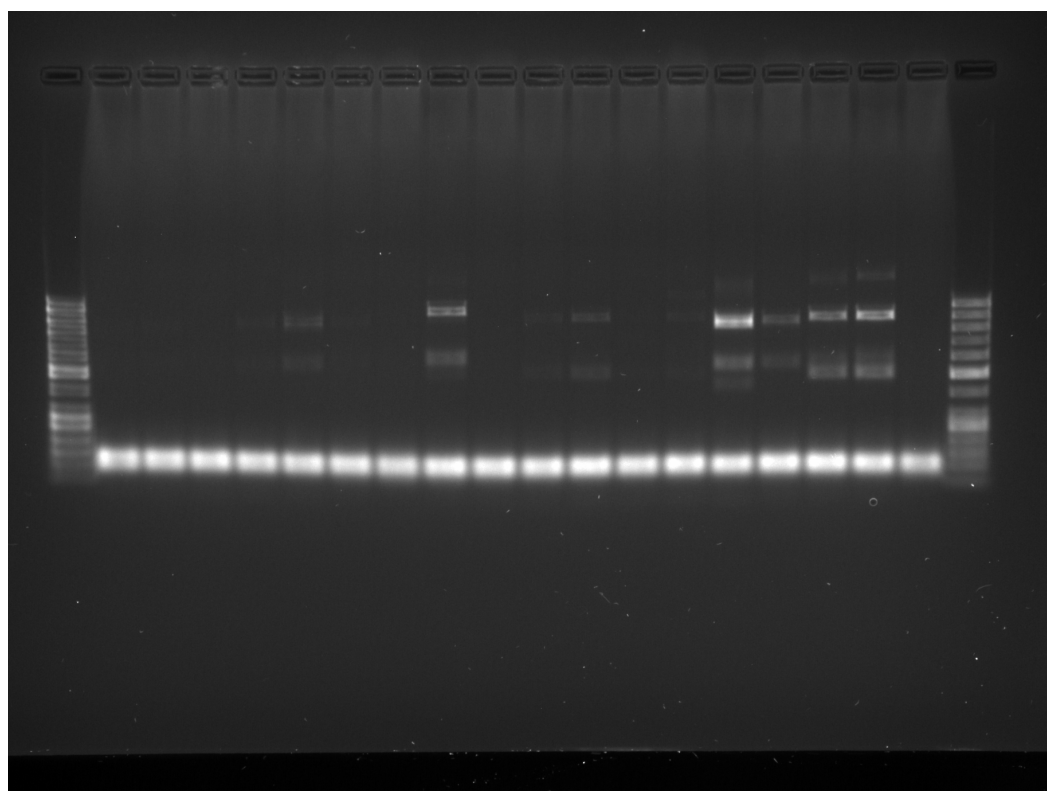

166  
167 Figure S7. Original gel image corresponding to figure S3. Image taken using the  
168 imaging system Molecular Imager Gel Doc XR+ (Bio-Rad Laboratories, USA) and the  
169 software Image Lab v 4.1 build 16 (Bio-Rad Laboratories, USA).

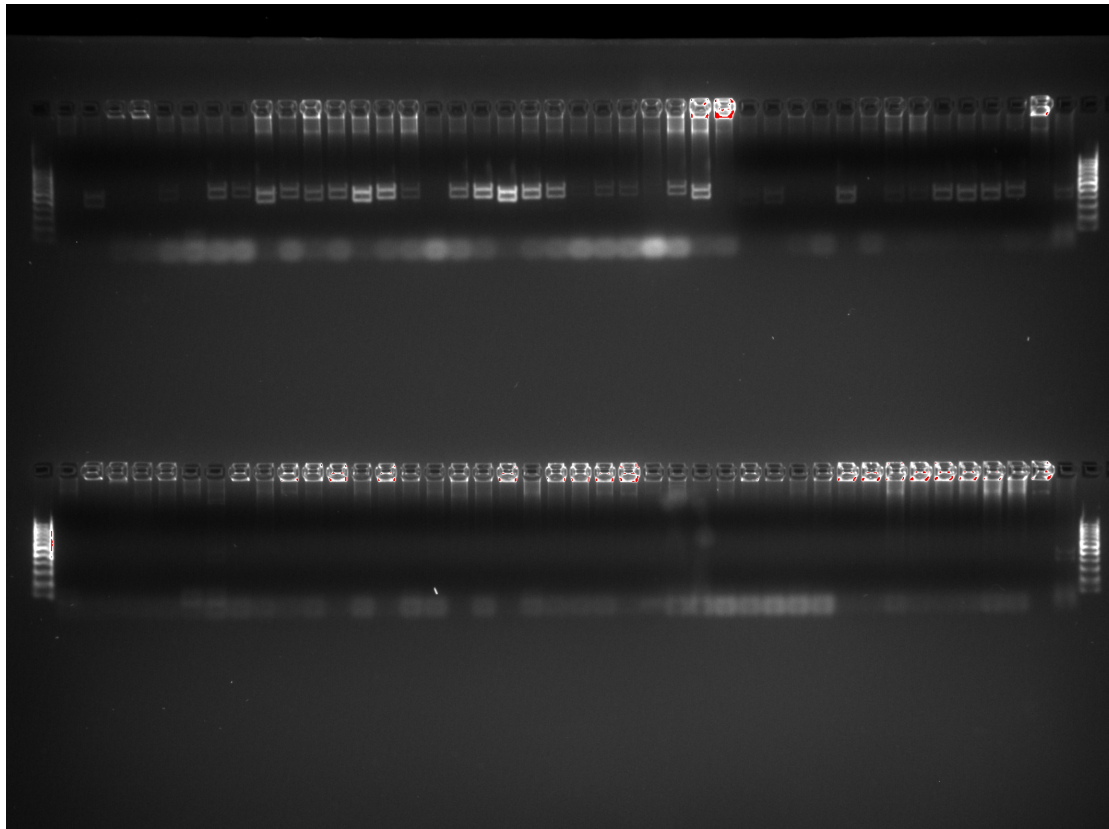

170  
171 Figure S8. Original gel image corresponding to the upper part of figure S5. Image taken  
172 using the imaging system Molecular Imager Gel Doc XR+ (Bio-Rad Laboratories,  
173 USA) and the software Image Lab v 4.1 build 16 (Bio-Rad Laboratories, USA).  
174

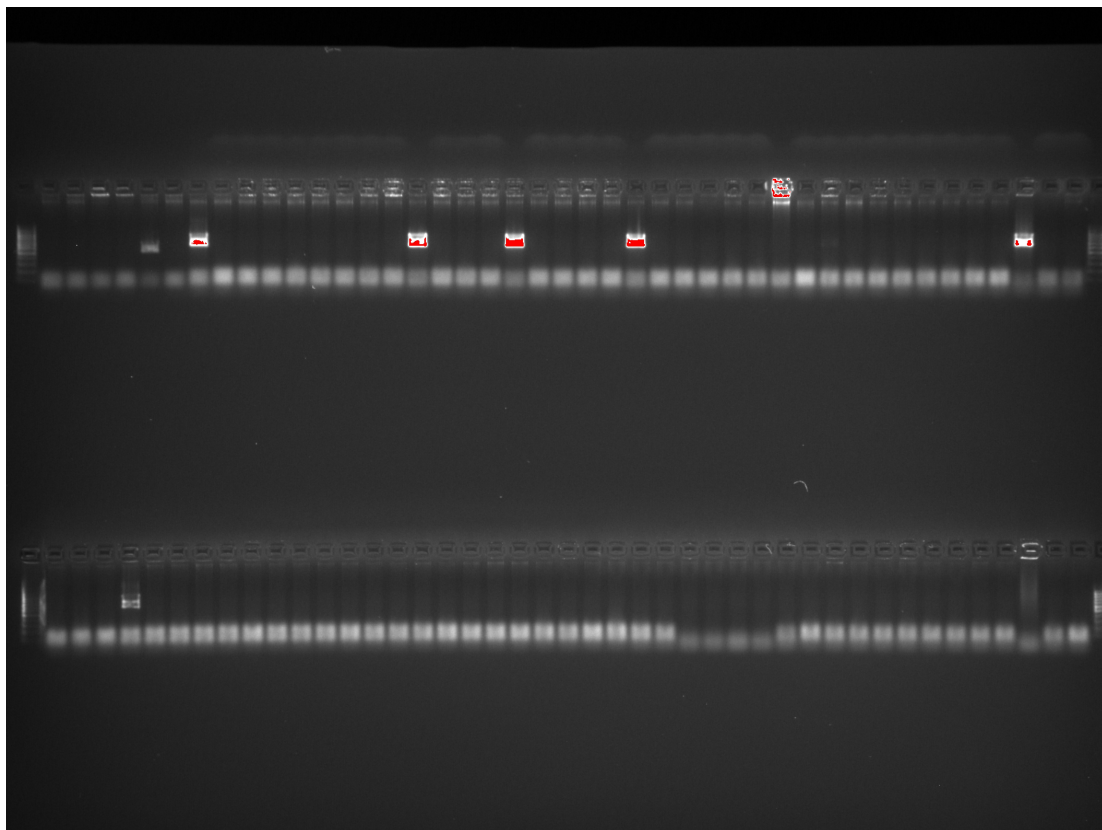

176  
177 Figure S9. Original gel image corresponding to the lower part of figure S5. Image taken  
178 using the imaging system Molecular Imager Gel Doc XR+ (Bio-Rad Laboratories,  
179 USA) and the software Image Lab v 4.1 build 16 (Bio-Rad Laboratories, USA).  
180
